# Supplementary material for: An end-to-end hybrid algorithm for automated medication discrepancy detection
Source: BMC Med Inform Decis Mak. 2015 May 6;15:37. doi: 10.1186/s12911-015-0160-8 (PMC4427951; doi:10.1186/s12911-015-0160-8)
Supplement: Supplementary file 1 — Table A.1 Pseudo-code of the attribute linkage algorithm (Process 2). [file 12911_2015_160_MOESM1_ESM.docx]

**Additional file**

**Table A.1** Pseudo-code of the attribute linkage algorithm (Process 2).

| **Input**: medication entities identified by entity detection and the corresponding start/end positions in the text  1) **Initialization**  sort the entities by the start positions  set the linkage information set  2) **For**  **If** is a medication attribute **then**  **For**  **If** is a medication name **then**  Break  **End if**  **End for**  **For**  **If** is a medication name **then**  Break  **End if**  **End for**  **If** **then**  **Else**  **End if**  **End if**  **End for**  **Return**: the linkage information set |
| --- |
